# Supplementary material for: Synthesis and electrochemical polymerization of diketopyrrolopyrrole based donor–acceptor–donor monomers containing 3,6- and 2,7-linked carbazoles
Source: Royal Society of Chemistry journal article supplement (doi:10.1039/c6py01489e), 2016-01-01
Supplement: c6py01489e1.pdf [file c6py01489e1.pdf]

## Supporting Information

### **Synthesis and electrochemical polymerization of Diketopyrrolopyrrole Based Donor-Acceptor-Donor monomers containing 3,6 and 2,7 linked carbazoles**

M. Akbayrak<sup>a</sup>, A. M. Önal<sup>a,\*</sup>

<sup>a</sup>Department of Chemistry, Middle East Technical University, 06800, Ankara, Turkey

\*Corresponding author. Tel.: +903122103188; Fax: +903122103200; E-mail: [aonal@metu.edu.tr](mailto:aonal@metu.edu.tr)

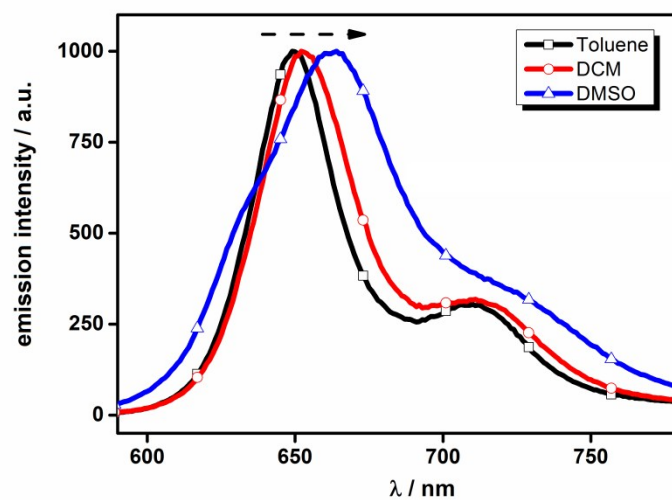

**Figure S1.** Fluorescence emission spectra of **36CzEtDPP** in toluene, DCM and DMSO (Excitation at 550 nm).

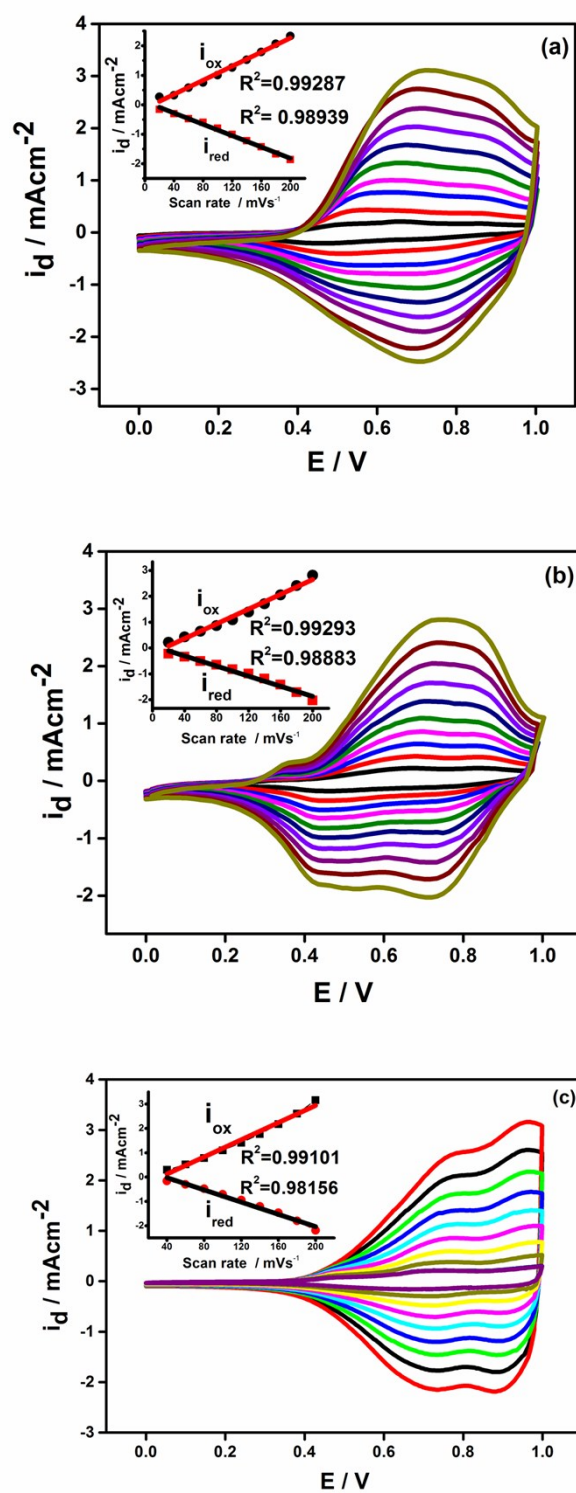

**Figure S2.** Scan rate dependencies of electrochemically synthesized (a) **36CzMeDPP**, (b) **36CzEtDPP** and (c) **27CzDPP** in 0.1 M TBABF<sub>4</sub>/ACN at scan rates of 20-200 mV/s ( Insets: Relationship of anodic and cathodic currents with respect to scan rate).

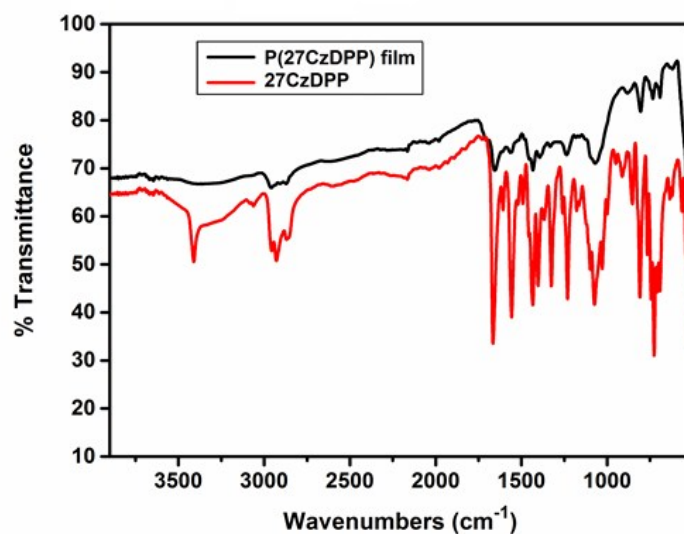

**Figure S3.** FTIR spectra of **27CzDPP** and **P(27CzDPP)**

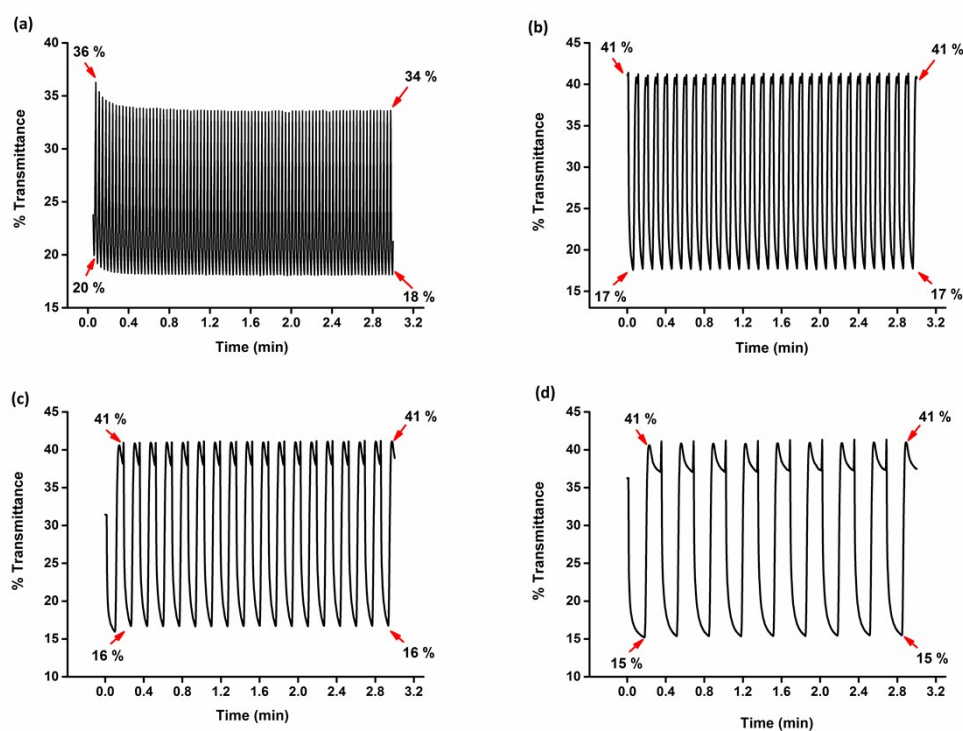

**Figure S4.** Kinetic study of **P(36CzMeDPP)** on ITO for (a) 1 s, (b) 3 s, (c) 5 s and (d) 10 s interval at 650 nm in 0.1 M TBABF<sub>4</sub>/ACN applied potential -0.5 V – 1.0 V.

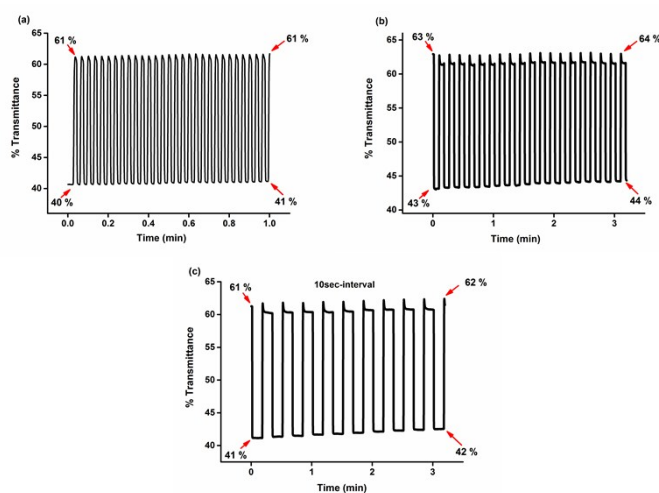

**Figure S5.** Kinetic study of **P(27CzDPP)** on ITO for (a) 1 s, (b) 5 s and (c) 10 s interval at 595 nm in 0.1 M TBABF<sub>4</sub>/ACN applied potential -0.5 V – 1.0 V.

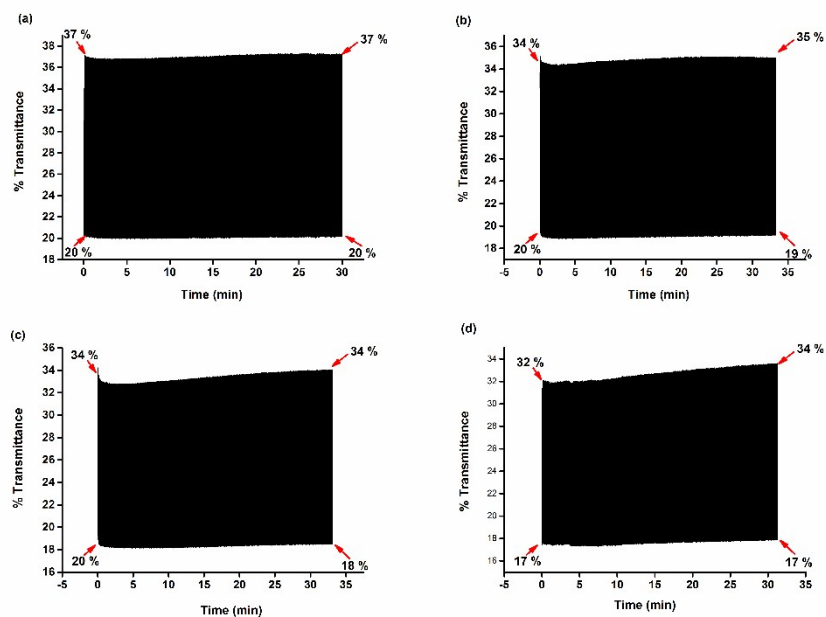

**Figure S6.** Stability study of **P(36CzEtDPP)** on ITO for 1 s interval (a) first, (b) second and (c) third and (d) fourth thousand cycle at 595 nm in 0.1 M TBABF<sub>4</sub>/ACN applied potential -0.5 V – 1.0 V.
